# Supplementary material
Source: Springer Nature journal article supplement (https://www.springermedizin.de/resource/supplementary/12979_2012_157_MOESM5_ESM.pdf/9603102)

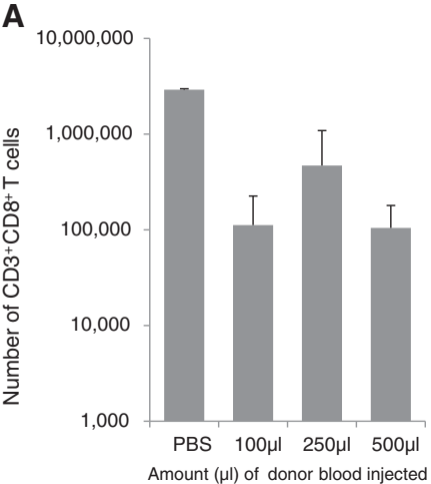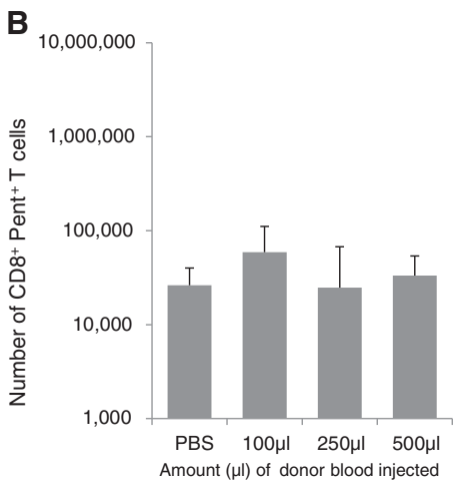

Supplement: MOESM5 [file 9603102]
